# Supplementary material for: TiO2sol-embedded in electroless Ni–P coating: a novel approach for an ultra-sensitive sorbitol sensor
Source: Royal Society of Chemistry journal article supplement (doi:10.1039/c6ra05090e), 2016-01-01
Supplement: c6ra05090e1.pdf [file c6ra05090e1.pdf]

**Supporting information (SI)**

**TiO<sub>2</sub> sol-embedded in electroless Ni-P coating: A novel approach for ultra-sensitive sorbitol sensor**

Pranee Rattanawaleedirojn<sup>a,\*</sup>, Kanokwan Saengkietyut<sup>a</sup>,

Yuttanant Boonyongmaneerat<sup>a</sup>, Supin Sangsuk<sup>b</sup>, Nadtinan Promphet<sup>c</sup>,

Nadnudda Rodthongkum<sup>a</sup>

<sup>a</sup>*Metallurgy and Materials Science Research Institute, Chulalongkorn University, Soi Chula 12, Phayathai Road, Pathumwan, Bangkok 10330 Thailand*

<sup>b</sup>*School of Agricultural Resources, Chulalongkorn University, Soi Chula 64, Phayathai Road, Pathumwan, Bangkok 10330 Thailand*

<sup>c</sup>*Nanoscience and Technology Program, Graduate School, Chulalongkorn University, Bangkok 10330, Thailand*

*\*Corresponding author e-mail: pranee.r@chula.ac.th (Rattanawaleedirojn, P.)*

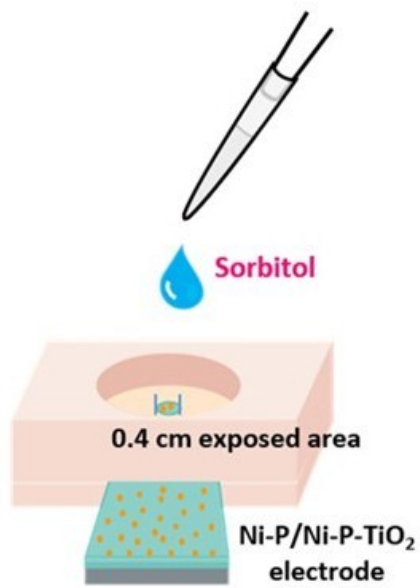

**Fig. S1** The configuration of an electrochemical cell used in this work.

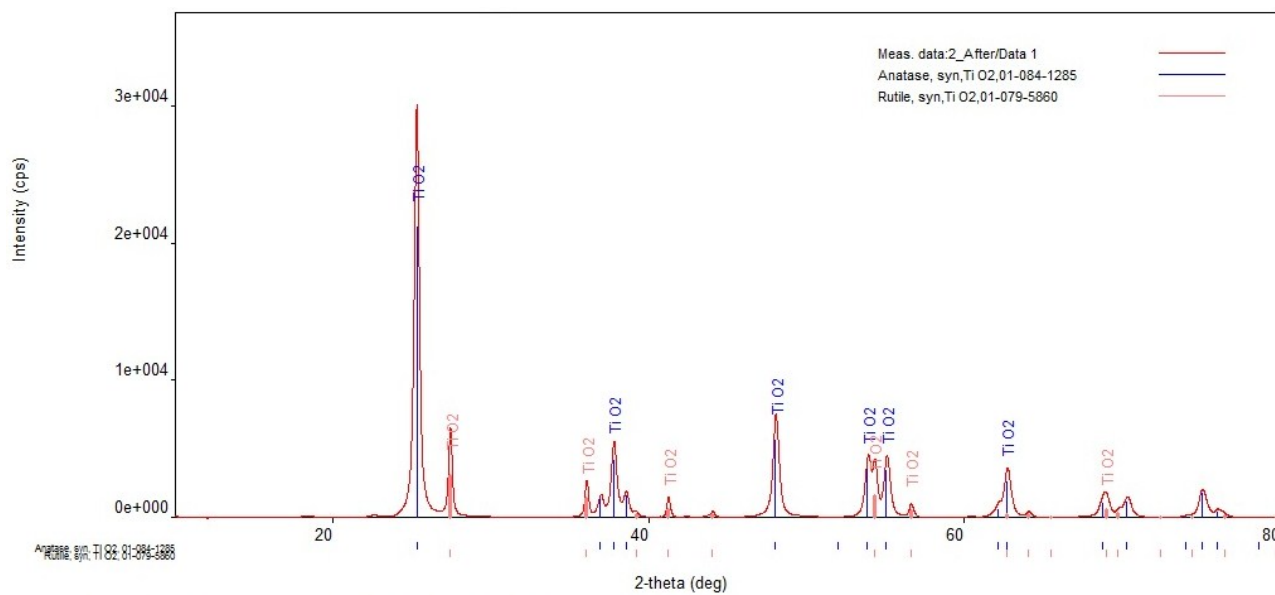

**Fig. S2** An XRD spectrum of white TiO<sub>2</sub> powder after calcination at 600 °C for 1 hour (Rigaku, SmartLab, scan rate 10-80 degree, speed 1 degree/min, step 0.01 degree).

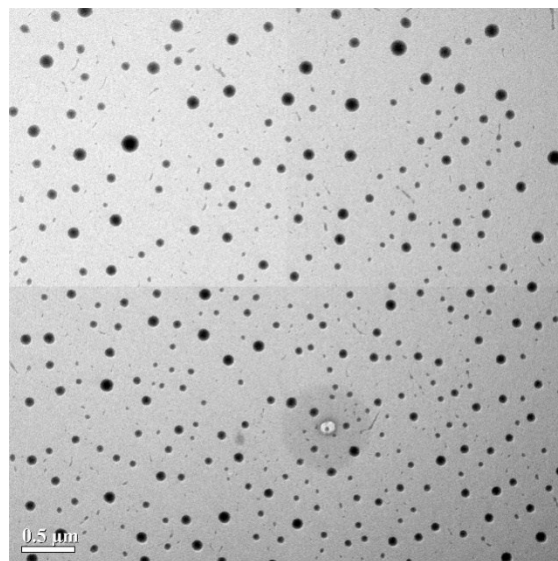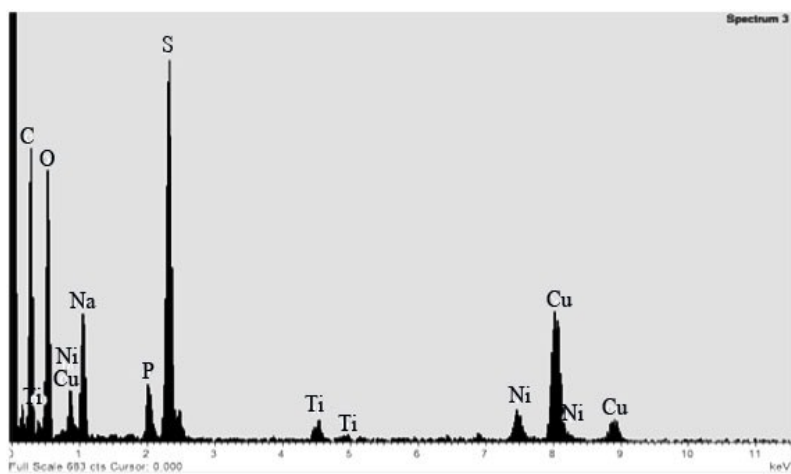

**Fig. S3** SEM images of  $\text{TiO}_2$  sol in Ni-P electroless bath.

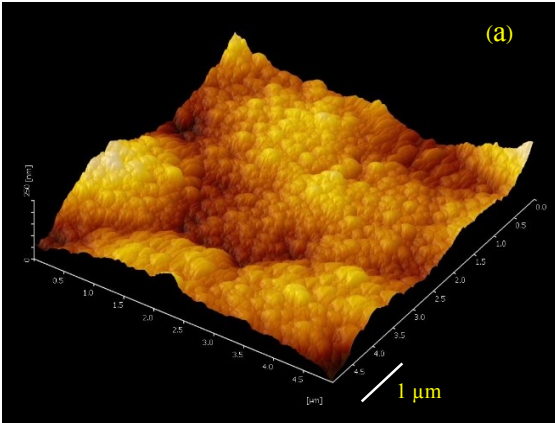

Ra = 22.52 nm  
 $S = 2.574 \times 10^7 \text{ nm}^2$

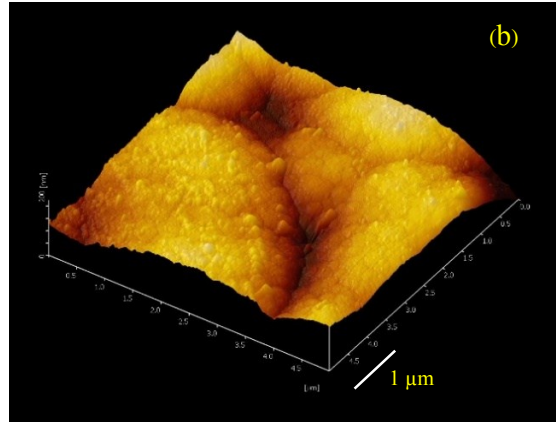

Ra = 22.59 nm  
 $S = 2.544 \times 10^7 \text{ nm}^2$

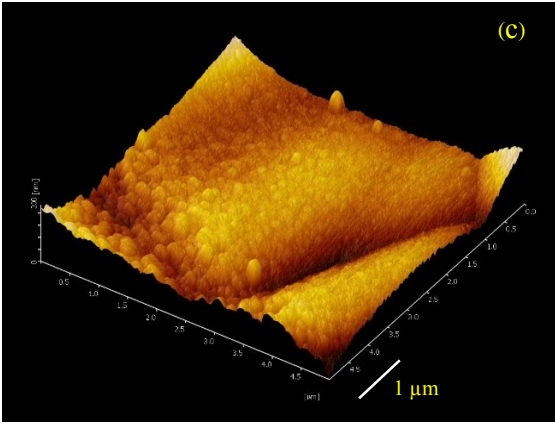

Ra = 19.02 nm  
 $S = 2.646 \times 10^7 \text{ nm}^2$

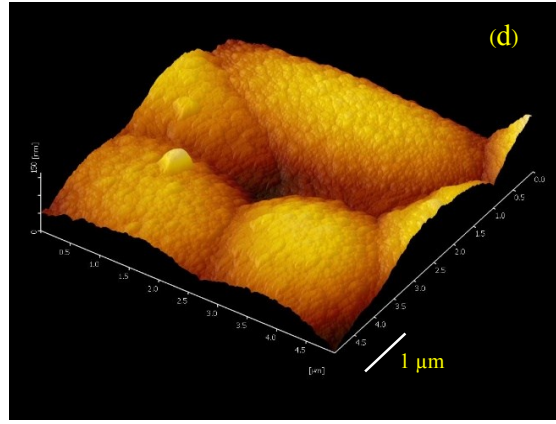

Ra = 19.96 nm  
 $S = 2.522 \times 10^7 \text{ nm}^2$

**Fig. S4** AFM images indicating the surface area ( $S$ ) of (a) Ni-P-TiO<sub>2</sub> (2 g/L of TiO<sub>2</sub>) coating, (b) Ni-P/Ni-P (0 g/L of TiO<sub>2</sub>) coating, (c) Ni-P/Ni-P-TiO<sub>2</sub> (2 g/L of TiO<sub>2</sub>) coating and (d) Ni-P/Ni-P-TiO<sub>2</sub> (4 g/L of TiO<sub>2</sub>) coating. (SPA-400 atomic force microscope (Seiko Instruments, Inc., Japan), using non-contact mode).

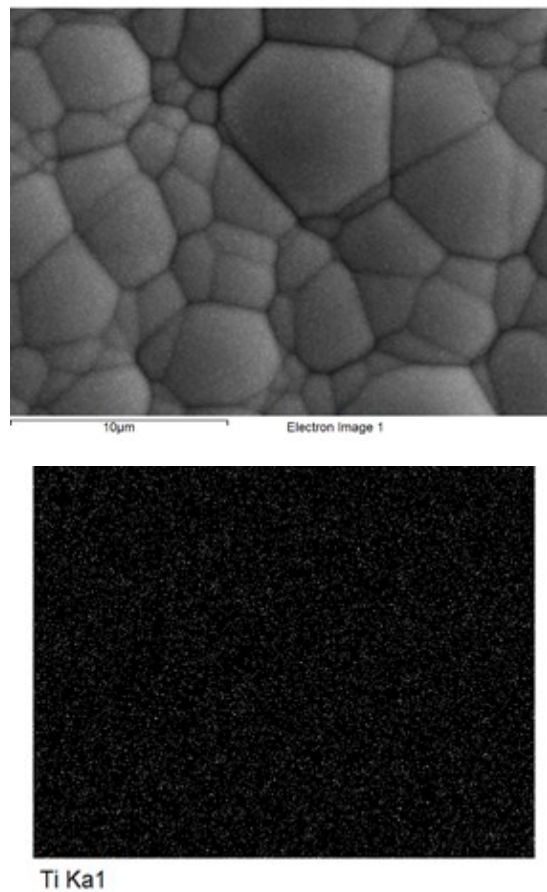

**Fig. S5** An SEM image of Ni-P-TiO<sub>2</sub> (top) and the surface mapping indicates the distribution of Ti on the coated surface (bottom).

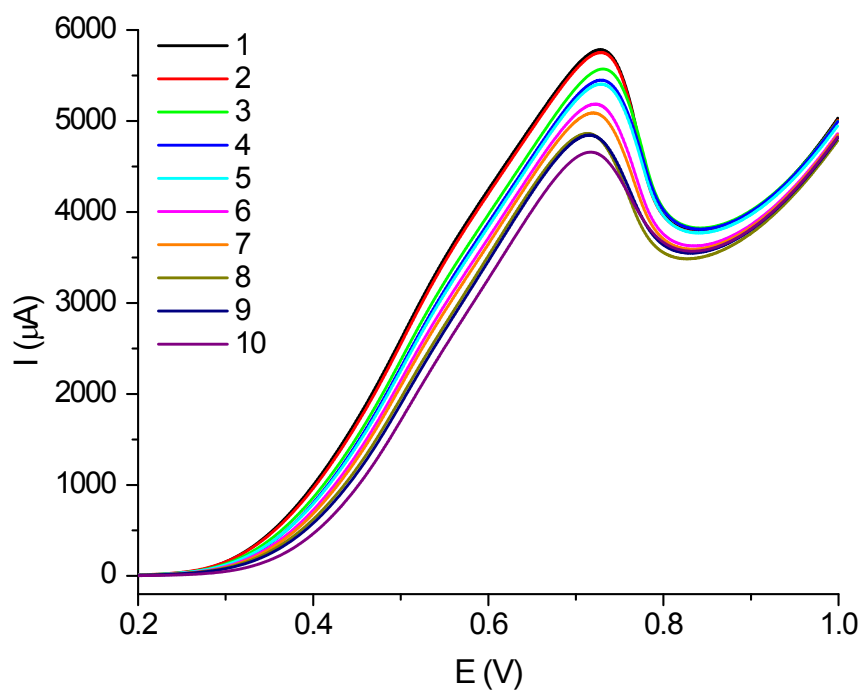

**Fig. S6** Reproducibility of Ni-P/Ni-P-TiO<sub>2</sub> electrode for 10 consecutive detection of sorbitol.

**Table S1** Stability of electrode for the detection of different compounds after storage for 7 days.

| Electrode                                                  | % of current signal compared to an original current signal |            |             |            |            |
|------------------------------------------------------------|------------------------------------------------------------|------------|-------------|------------|------------|
|                                                            | Methanol                                                   | Ethanol    | Isopropanol | Sorbitol   | Glucose    |
| Ni-P                                                       | 85.1 ± 13                                                  | 84.4 ± 25  | 83.0 ± 11   | 85.0 ± 16  | 83.2 ± 12  |
| Ni-P-TiO <sub>2</sub><br>(2 g/L of TiO <sub>2</sub> )      | 89.0 ± 3.9                                                 | 90.1 ± 2.6 | 89.0 ± 3.5  | 91.0 ± 4.1 | 83.3 ± 1.9 |
| Ni-P/Ni-P-TiO <sub>2</sub><br>(2 g/L of TiO <sub>2</sub> ) | 91.5 ± 1.4                                                 | 93.7 ± 1.2 | 93.6 ± 1.6  | 96.4 ± 1.1 | 89.5 ± 3.4 |
